# Supplementary material
Source: PubMed Central journal article supplement (PMC3023363)
Supplement: supp_00625.2010_suppmat.pdf [file supp_00625.2010_suppmat.pdf]

SI Fig 1

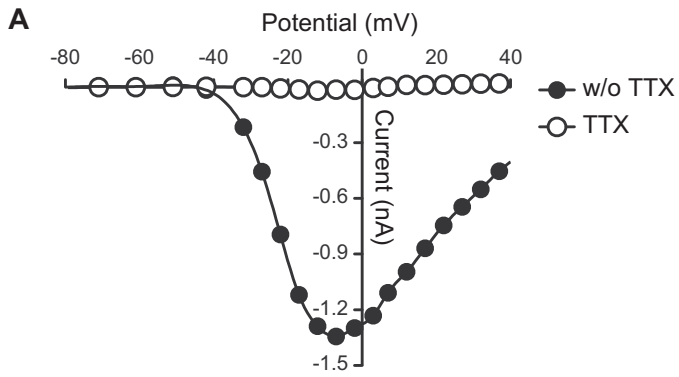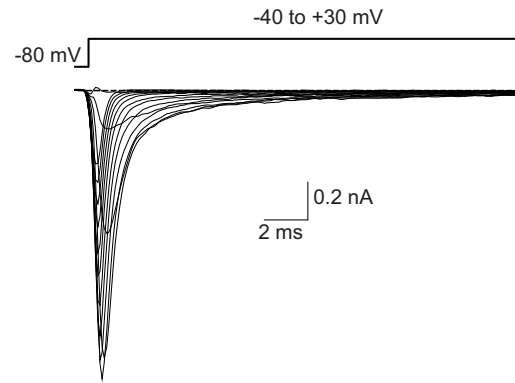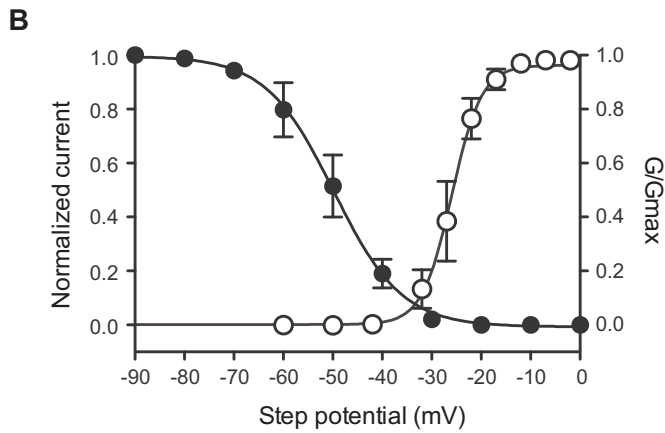

| Voltage-dependent properties of $I_{Na}$ |                 |                |
|------------------------------------------|-----------------|----------------|
|                                          | $V_{1/2}$ , mV  | k, mV          |
| Activation                               | $-25.9 \pm 0.6$ | $3.0 \pm 0.5$  |
| Inactivation                             | $-49.8 \pm 1.1$ | $-6.9 \pm 1.0$ |

## Supplementary Figure Legend

SI FIG. 1. Voltage-dependent  $\text{Na}^+$  current ( $I_{\text{Na}}$ ) in R-B neurons. *A: Left*,  $\text{Na}^+$  current-voltage ( $I$ - $V$ ) relationships in presence (open circles) or absence (filled circles) of 300 nM tetrodotoxin (TTX). For recording of  $I_{\text{Na}}$ , the external solution contained (mM) 127 NaCl, 3 KCl, 20 TEA-Cl, 5  $\text{MnCl}_2$ , and 5 HEPES (pH 7.4, 300 mOsm/kg  $\text{H}_2\text{O}$ ). The pipette solution contained (mM) 120 *N*-methyl-D-glucamine, 20 TEA-OH, 11 EGTA, 1  $\text{CaCl}_2$ , 10 HEPES, 10 glucose, 4  $\text{Na}_2\text{ATP}$ , 0.3  $\text{Na}_2\text{GTP}$ , and 5 Tris-creatine phosphate (pH 7.2, 290 mOsm/kg  $\text{H}_2\text{O}$ ).  $I_{\text{Na}}$  were evoked by a series of voltages steps to potentials ranging between -70 and +40 mV from a holding potential of -80 mV. *Right*, Superimposed current traces recorded from R-B neurons in absence of TTX. For illustrative purposes current traces from -40 to +30 mV are shown. *B: Voltage-dependent properties of  $I_{\text{Na}}$  recorded from R-B neurons. Left*, The voltage-dependence of the  $\text{Na}^+$  conductance ( $G_{\text{Na}}$ , open circles) and steady-state inactivation (filled circles) of  $I_{\text{Na}}$  from R-B neurons. Conductance ( $G$ ) was calculated as  $G_{\text{Na}} = I_{\text{Na}} / (V_m - V_{\text{rev}})$ , in which  $I_{\text{Na}}$  is the peak current,  $V_m$  is the voltage, and  $V_{\text{rev}}$  is the reversal potential for  $I_{\text{Na}}$ . The mean reversal potential,  $59.6 \pm 3.2$  mV ( $n = 3$ ), was estimated from the linear portion of the  $I$ - $V$  relationships. The solid line represents a nonlinear regression fit to the Boltzmann function:  $1 / (1 + \exp[-(V - V_{1/2}) / k])$ , where  $V$  is the step membrane potential,  $V_{1/2}$  is the half-activation potential, and  $k$  is a slope factor. Voltage-dependence of inactivation was determined using a 200 ms conditioning pulse followed by a test pulse to -10 mV. Test pulse currents are normalized to the maximal value. Solid line is a fit to the Boltzmann equation (see previous text;  $k$  is negative for inactivation curve). *Right*, Mean activation and steady-state inactivation parameters.
